# Supplementary material for: Hierarchical Polyaniline Core-Shell Nanocomposites Coated on Modified Graphite for Improved Electrical Conductivity Performance
Source: MDPI journal article supplement (doi:10.3390/nano12213776), 2022-10-26
Supplement: s1 [file s1]

# Hierarchical Polyaniline Core-shell Nanocomposites Coated on Modified Graphite for Improved Electrical Conductivity Performance

Asima Naz <sup>1,2</sup>, Rabia Sattar <sup>3,\*</sup> and Firstname Lastname <sup>2</sup>

<sup>1</sup> Department of Chemistry, Mirpur University of Science & Technology (MUST), Mirpur, Azad Jammu & Kashmir

<sup>2</sup> Department of Polymer Science & Engineering, Zhejiang University, Hangzhou 310027, China

<sup>3</sup> Department of Chemistry, The University of Lahore, Sargodha Campus, Sargodha, Pakistan

\* Correspondence: rabiasattar39@yahoo.com;

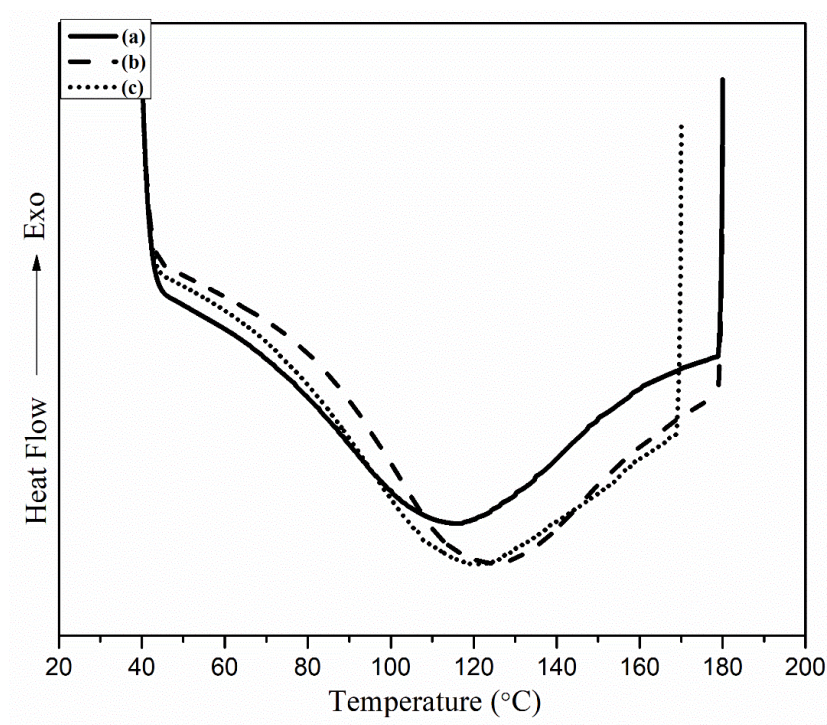

**Figure S1.** DSC thermograms showing T<sub>g</sub> of: (a) Composite I; (b) Composite II; (c) Composite III.

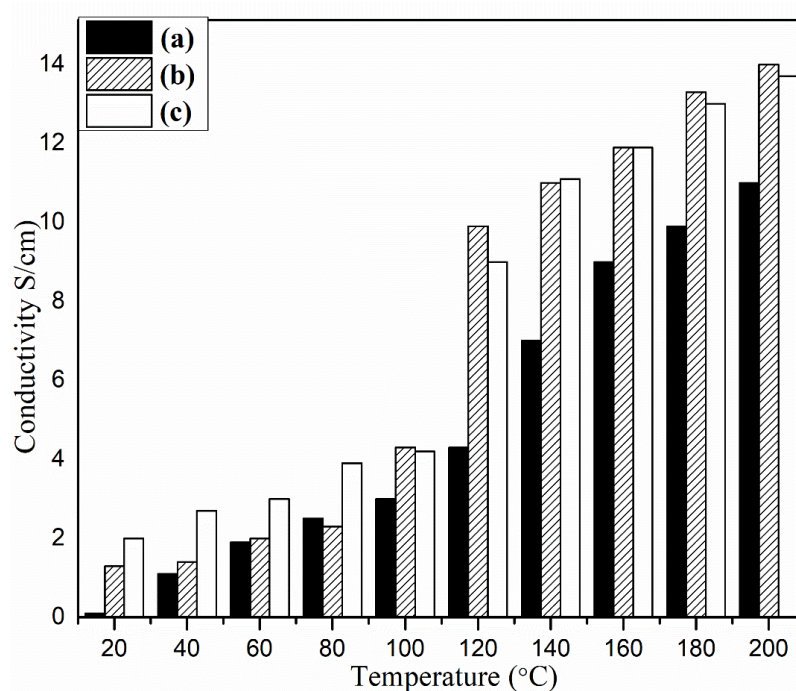

**Figure S2.** Electrical conductivity display of: (a) Composite I; (b) Composite II; (c) Composite III.

**Table S1.** FTIR peaks assignment for PANi@FG, PANi/PMMA@FG & PANi/PMMA/PPG-b-PEG-b-PPG@FG.

| Sample                           | $\nu$ C-O<br>( $\text{cm}^{-1}$ ) | $\nu$ N-H<br>( $\text{cm}^{-1}$ ) | $\nu$ C-N<br>( $\text{cm}^{-1}$ ) | $\omega$ C-H<br>( $\text{cm}^{-1}$ ) | $\nu$ C=O<br>( $\text{cm}^{-1}$ ) | $\nu$ CH <sub>3</sub><br>( $\text{cm}^{-1}$ ) | Quinoid<br><i>vib</i> ( $\text{cm}^{-1}$ ) | $\nu_{\text{as}}$ C-H<br>( $\text{cm}^{-1}$ ) |
|----------------------------------|-----------------------------------|-----------------------------------|-----------------------------------|--------------------------------------|-----------------------------------|-----------------------------------------------|--------------------------------------------|-----------------------------------------------|
| FG                               | 1050-1412                         | -                                 | -                                 | 2969                                 | 1728                              | -                                             | -                                          | -                                             |
| PANi@FG                          | 1168                              | 3438,<br>1167                     | 1398                              | 795                                  | 1707                              | -                                             | 1475                                       | 2850                                          |
| PANi/PMMA@FG                     | 1118                              | 3425                              | 1300                              | 663                                  | 1721                              | 2921,<br>1290                                 | 1479                                       | 2843                                          |
| PANi/PMMA/PPG-<br>b-PEG-b-PPG@FG | 1117                              | 3411                              | 1300                              | 669                                  | 1728                              | -                                             | -                                          | 2898                                          |

$\nu$  = stretch,  $\omega$  = out-of-plane bending and as = asymmetric

**Table S2.** TGA data of nanocomposites.

| Sample                       | T <sub>0</sub><br>(°C) | T <sub>20</sub><br>(°C) | T <sub>max</sub><br>(°C) | Y <sub>c</sub> at<br>550 °C |
|------------------------------|------------------------|-------------------------|--------------------------|-----------------------------|
| PANi@FG                      | 102                    | 351                     | 522                      | 81                          |
| PANi/PMMA@FG                 | 111                    | 353                     | 530                      | 82                          |
| PANi/PMMA/PPG-b-PEG-b-PPG@FG | 113                    | 336                     | 549                      | 71                          |

**Table S3.** DSC data of PANi/PMMA/PPG-b-PEG-b-PPG@FG composites.

| Composite                    | T <sub>g</sub> (°C) | T <sub>m</sub> (°C) | T <sub>c</sub> (°C) | ΔH <sub>m</sub> (J g <sup>-1</sup> ) | ΔH <sub>c</sub> (J g <sup>-1</sup> ) |
|------------------------------|---------------------|---------------------|---------------------|--------------------------------------|--------------------------------------|
| PANi@FG                      | 67, 114             | 143                 | 173                 | 0.403                                | 0.793                                |
| PANi/PMMA@FG                 | 74, 124             | 145                 | 174                 | 0.449                                | 1.22                                 |
| PANi/PMMA/PPG-b-PEG-b-PPG@FG | 103, 120            | 160                 | 178                 | 1.02                                 | 2.06                                 |

**Table S4.** XRD parameters showing relative peak position of prepared multilayered nanocomposites.

| Sample                       | Peak position | FWHM  | d-spacing |
|------------------------------|---------------|-------|-----------|
| PANi@FG                      | 26.55         | 0.433 | 4.25      |
| PANi/PMMA@FG                 | 26.51         | 0.47  | 4.46      |
| PANi/PMMA/PPG-b-PEG-b-PPG@FG | 26.50         | 0.31  | 4.47      |
| Composite I                  | 26.65         | 0.47  | 4.43      |
| Composite II                 | 26.59         | 0.47  | 4.44      |
| Composite III                | 26.53         | 0.47  | 4.46      |

**Table S5.** Textural information of PANi@FG, PANi/PMMA@FG & PANi/PMMA/PPG-b-PEG-b-PPG@FG.

| Material                     | S <sub>BET</sub> (m <sup>2</sup> g <sup>-1</sup> ) | D <sub>p</sub> (nm) | V <sub>p</sub> (cm <sup>3</sup> g <sup>-1</sup> ) |
|------------------------------|----------------------------------------------------|---------------------|---------------------------------------------------|
| PANi@FG                      | 0.554                                              | 3.43                | 3.18                                              |
| PANi/PMMA@FG                 | 1.85                                               | 4.60                | 1.27                                              |
| PANi/PMMA/PPG-b-PEG-b-PPG@FG | 4.58                                               | 2.27                | 5.19                                              |

V<sub>p</sub>: Pore volume; D<sub>p</sub>: Pore size distribution; S<sub>BET</sub>: BET surface area
